# Supplementary material for: Within-Host Competition between Two Entomopathogenic Fungi and a Granulovirus in Diatraea saccharalis (Lepidoptera: Crambidae)
Source: PubMed Central journal article supplement (PMC6023289; doi:10.3390/insects9020064), 2018-06-13
Supplement: insects-09-00064-s001.pdf [file insects-09-00064-s001.pdf]

**Table S1.** Pairwise comparisons for logit-lines of single inoculations of fungal entomopathogens and granulovirus based on tests whether slopes and intercepts are different or not, using the likelihood ratio test. .

| Pairwise comparison | Pathogen effect |       |                   | Concentration effect |       |                   | Pathogen x Concentration effect |       |                 |
|---------------------|-----------------|-------|-------------------|----------------------|-------|-------------------|---------------------------------|-------|-----------------|
|                     | devianc         | df    | adj. <i>P</i> *   | devianc              | df    | adj. <i>P</i> *   | devianc                         | df    | adj. <i>P</i> * |
|                     | e               |       |                   | e                    |       |                   | e                               |       | <i>P</i> *      |
| Bb vs. Ma           | 52.92           | 2, 48 | <b>&lt; 0.001</b> | 79.86                | 1, 47 | <b>&lt; 0.001</b> | 2.93                            | 1, 46 | 0.087           |
| Bb vs. DisaGV       | 60.487          | 2, 48 | <b>&lt; 0.001</b> | 57.36                | 1, 47 | <b>&lt; 0.001</b> | 0.128                           | 1, 46 | 0.72            |
| Ma vs. DisaGV       | 27.70           | 2, 48 | <b>&lt; 0.001</b> | 88.95                | 1, 47 | <b>&lt; 0.001</b> | 1.93                            | 1, 46 | 0.16            |

\**P*-values adjusted for three pairwise comparisons with Bonferroni. Significant *P*-value is highlighted in bold.

Ma = *Metarhizium anisopliae*

Bb = *Beauveria bassiana*

DisaGV = *Diatraea saccharalis* granulovirus

**Table S2.** Pairwise comparisons for single entomopathogen inoculations in contrast with their mixed (combined) applications based on test hypothesis of parallelism or equality, using the likelihood ratio test.

| Pairwise comparison           | Pathogen × Concentration  |       |                   |                                 |       |                   |
|-------------------------------|---------------------------|-------|-------------------|---------------------------------|-------|-------------------|
|                               | effect (parallelism test) |       |                   | Pathogen effect (equality test) |       |                   |
|                               | deviance                  | df    | adj. <i>P</i> *   | deviance                        | df    | adj. <i>P</i> *   |
| Bb vs. “Bb + Ma”              | 0.005                     | 1, 47 | 1.00              | 0.003                           | 2, 48 | 1.00              |
| Bb vs. “Bb + DisaGV ”         | 0.751                     | 1, 47 | 0.833             | 9.20                            | 2, 48 | <b>&lt; .0001</b> |
| Bb vs. “Bb + Ma + DisaGV ”    | 1.083                     | 1, 47 | 0.393             | 5.54                            | 2, 48 | <b>&lt; .0001</b> |
| Ma vs. “Ma + Bb”              | 1.927                     | 1, 47 | <b>0.014</b>      | 3.57                            | 2, 48 | <b>&lt; .0001</b> |
| Ma vs. “Ma + DisaGV ”         | 3.042                     | 1, 47 | <b>&lt; .0001</b> | 1.823                           | 2, 48 | <b>0.021</b>      |
| Ma vs. “Ma + Bb + DisaGV ”    | 0.122                     | 1, 47 | 1.00              | 0.76                            | 2, 48 | 0.824             |
| DisaGV vs. “DisaGV + Bb”      | 0.445                     | 1, 47 | 0.997             | 5.05                            | 2, 48 | <b>&lt; .0001</b> |
| DisaGV vs. “DisaGV + Ma”      | 0.343                     | 1, 47 | 1.00              | 0.175                           | 2, 48 | 1.00              |
| DisaGV vs. “DisaGV + Bb + Ma” | 0.77                      | 1, 47 | 0.812             | 2.27                            | 2, 48 | <b>0.003</b>      |

\**P*-values adjusted for nine pairwise comparisons with Bonferroni. Pathogen applied alone (single inoculation), to which all other mixed treatments (inoculations) are compared according to the likelihood ratio test at  $P < 0.05$  (significant *P*-value is highlighted in bold).

Ma = *Metarhizium anisopliae*

Bb = *Beauveria bassiana*

DisaGV = *Diatraea saccharalis* granulovirus

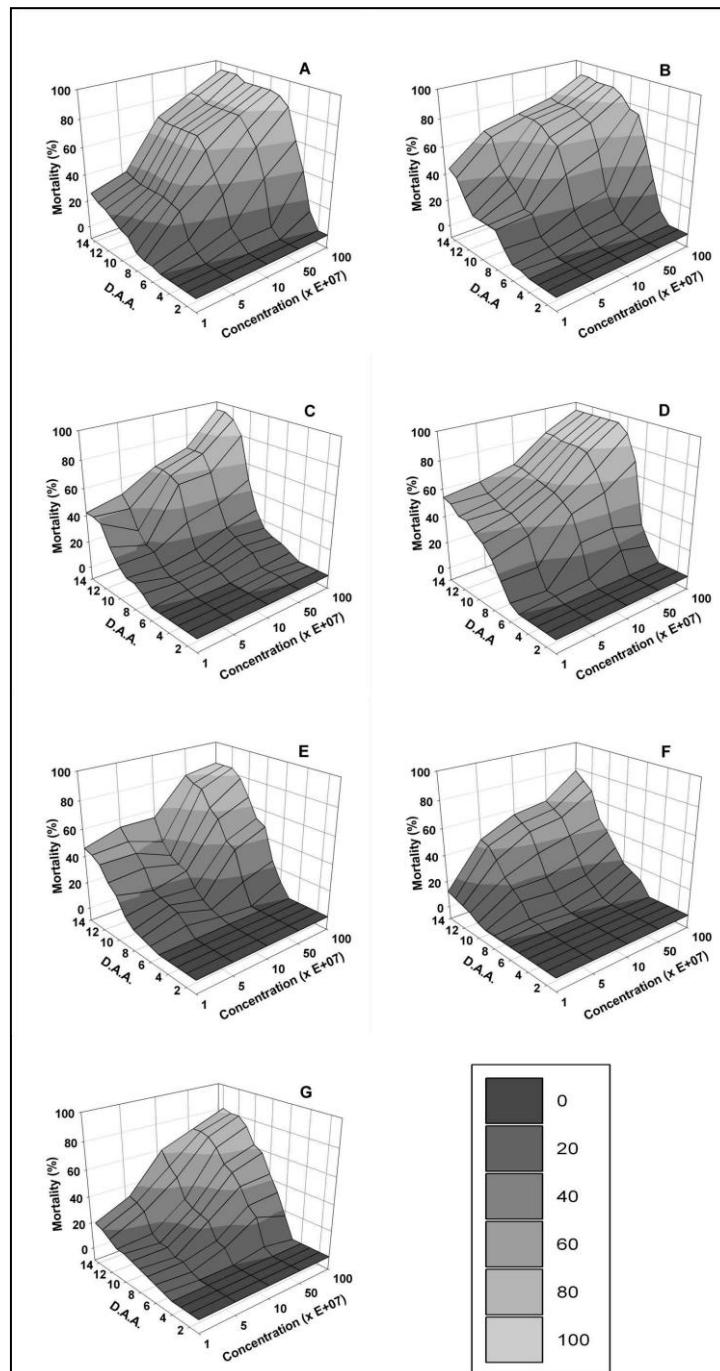

**Figure S1.** Three dimension plots describing the temporal progression of sugarcane borer larval mortality as function of the inoculum concentration when exposed to single or a mixture of two or all three pathogens. Right legend represents a gradient of mortality on a gray scale. D.A.A. = days after application. A) *M. anisopliae* alone, B) *B. bassiana*

alone, C) DisaGV alone, D) *M. anisopliae* + *B. bassiana*, E) *M. anisopliae* + DisaGV, F) *B. bassiana* + DisaGV, G) *M. anisopliae* + *B. bassiana* + DisaGV.
